# Supplementary material for: Liver sinusoidal endothelial cells (LSECs) modifications in patients with chronic hepatitis C
Source: PubMed Central journal article supplement (PMC6584733; doi:10.1038/s41598-019-45114-1), 2019-06-19
Supplement: 41598_2019_45114_MOESM1_ESM.pdf [file 41598_2019_45114_MOESM1_ESM.pdf]

## **Supplementary Data**

### **“Liver sinusoidal endothelial cells (LSECs) modifications in patients with chronic hepatitis C.”**

Andrea Baiocchini, Franca Del Nonno, Chiara Taibi, Ubaldo Visco-Comandini, Gianpiero D'Offizi, Mauro Piacentini, Laura Falasca

## Supplementary Figure S1

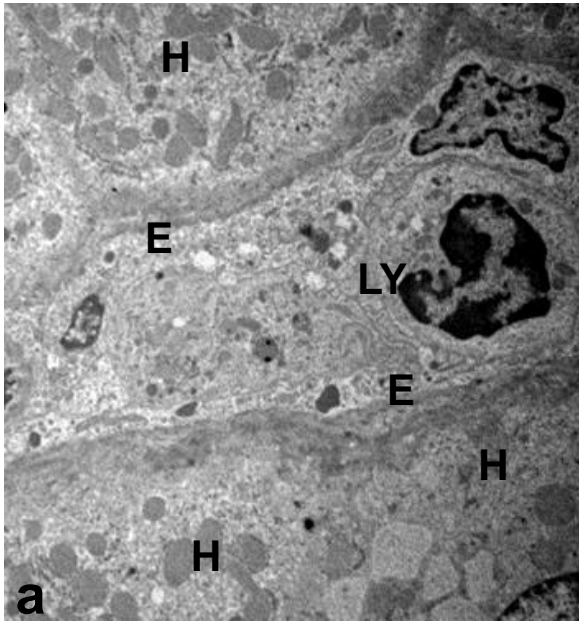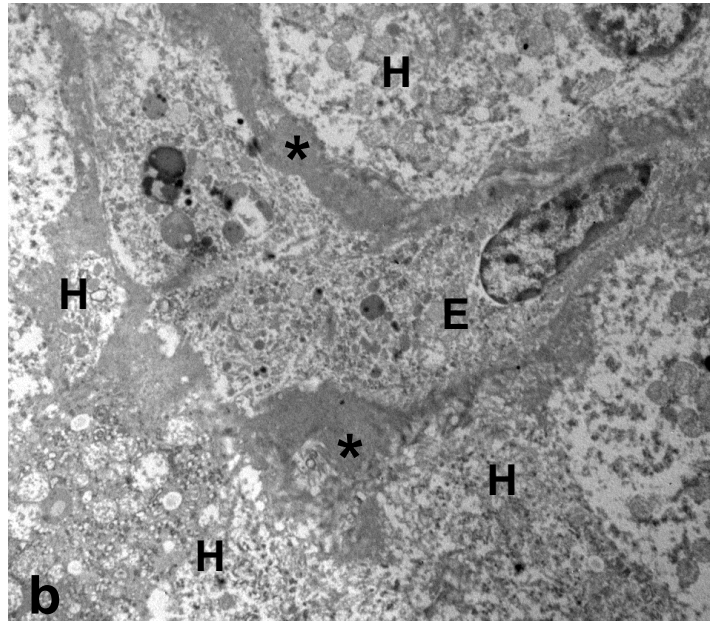

Representative transmission EM images of LSECs capillarization in liver from HCV-negative patients at early (a) and higher (b) stage of fibrosis.

A continuous endothelial cells (E) lining is associated to a basement membrane formation (\*).

## Supplementary Table S1

| <b>Pz<br/>(n.)</b> | <b>HCV<br/>genotype</b> | <b>HCV viral<br/>load<br/>(IU/mL)</b> | <b>Total<br/>cholesterol<br/>(mg/dl)</b> | <b>ALT<br/>(mg/dl)</b> | <b>AST<br/>(mg/dl)</b> | <b>Fibrosis<br/>stage</b> | <b>Capillarized<br/>LSECs<br/>(Yes/No)</b> |
|--------------------|-------------------------|---------------------------------------|------------------------------------------|------------------------|------------------------|---------------------------|--------------------------------------------|
| 1                  | 1                       | 22.9 x 10 <sup>5</sup>                | 150                                      | 353                    | 262                    | S4                        | NO                                         |
| 2                  | 1                       | 46.7 x 10 <sup>5</sup>                | 150                                      | 75                     | 51                     | S4                        | NO                                         |
| 3                  | 1                       | 2.9 x 10 <sup>5</sup>                 | 178                                      | 16                     | 21                     | S2                        | <b>YES</b>                                 |
| 4                  | 1                       | 56.9 x 10 <sup>5</sup>                | 230                                      | 68                     | 43                     | S6                        | NO                                         |
| 5                  | 3                       | 41.2 x 10 <sup>5</sup>                | 82                                       | 183                    | 122                    | S5                        | NO                                         |
| 6                  | 1                       | 4.44 x 10 <sup>5</sup>                | 111                                      | 109                    | 153                    | S5                        | NO                                         |
| 7                  | 1                       | 3.01 x 10 <sup>5</sup>                | 142                                      | 39                     | 33                     | S4                        | NO                                         |
| 8                  | 1                       | 1.2 x 10 <sup>5</sup>                 | 210                                      | 44                     | 32                     | S2                        | NO                                         |
| 9                  | 1                       | 1.4 x 10 <sup>5</sup>                 | 119                                      | 35                     | 31                     | S2                        | <b>YES</b>                                 |
| 10                 | 1                       | 0.6 x 10 <sup>5</sup>                 | 182                                      | 52                     | 42                     | S2                        | <b>YES</b>                                 |
| 11                 | 1                       | 4.96 x 10 <sup>5</sup>                | 210                                      | 104                    | 95                     | S5                        | NO                                         |
| 12                 | 3                       | 0.2 x 10 <sup>5</sup>                 | 124                                      | 50                     | 46                     | S4                        | NO                                         |
| 13                 | 1                       | 3.4 x 10 <sup>5</sup>                 | 168                                      | 43                     | 52                     | S4                        | NO                                         |
| 14                 | 1                       | 1.3 x 10 <sup>5</sup>                 | 150                                      | 103                    | 81                     | S5                        | NO                                         |
| 15                 | 1                       | 33.9 x 10 <sup>5</sup>                | 181                                      | 65                     | 102                    | S5                        | NO                                         |
| 16                 | 1                       | 2.2 x 10 <sup>5</sup>                 | 166                                      | 25                     | 33                     | S2                        | <b>YES</b>                                 |
| 17                 | 4                       | 12.2 x 10 <sup>5</sup>                | 172                                      | 36                     | 41                     | S6                        | NO                                         |
| 18                 | 1                       | 15.4 x 10 <sup>5</sup>                | 152                                      | 65                     | 53                     | S5                        | NO                                         |
| 19                 | 3                       | 0.7 x 10 <sup>5</sup>                 | 164                                      | 84                     | 143                    | S4                        | NO                                         |
| 20                 | 3                       | 33 x 10 <sup>5</sup>                  | 134                                      | 34                     | 26                     | S3                        | NO                                         |
| 21                 | 1                       | 44.7 x 10 <sup>5</sup>                | 147                                      | 37                     | 48                     | S3                        | NO                                         |
| 22                 | 1                       | 73.1 x 10 <sup>5</sup>                | 203                                      | 46                     | 40                     | S2                        | NO                                         |
| 23                 | 4                       | 2.1 x 10 <sup>5</sup>                 | 171                                      | 94                     | 74                     | S4                        | NO                                         |
| 24                 | 1                       | 15.4 x 10 <sup>5</sup>                | 158                                      | 121                    | 124                    | S6                        | NO                                         |

# Supplementary Figure S2

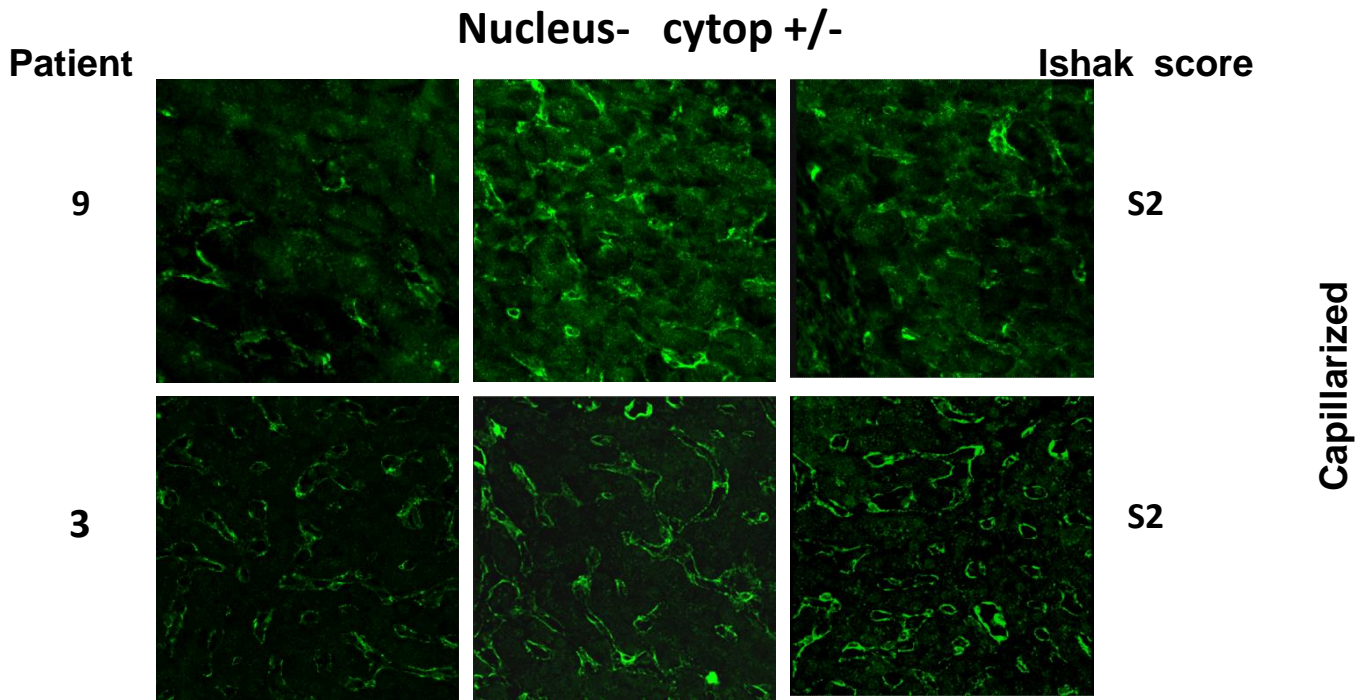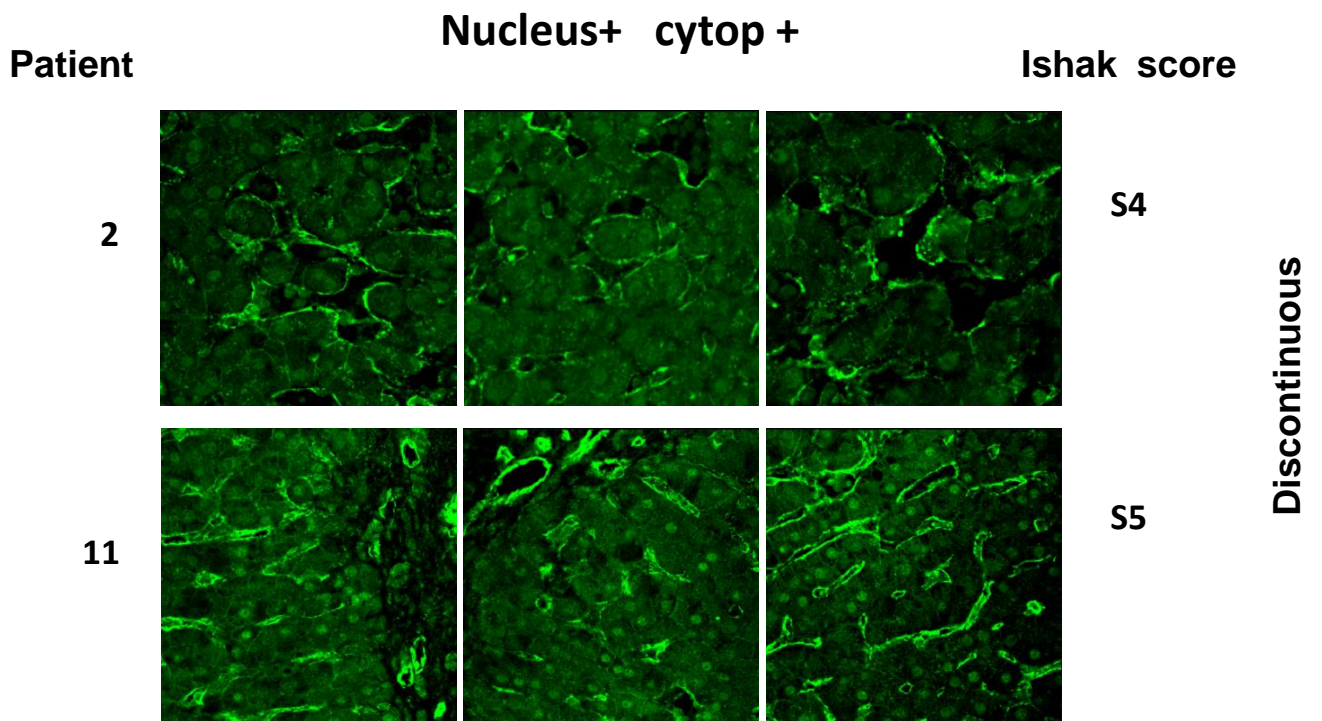

# Supplementary Figure S2

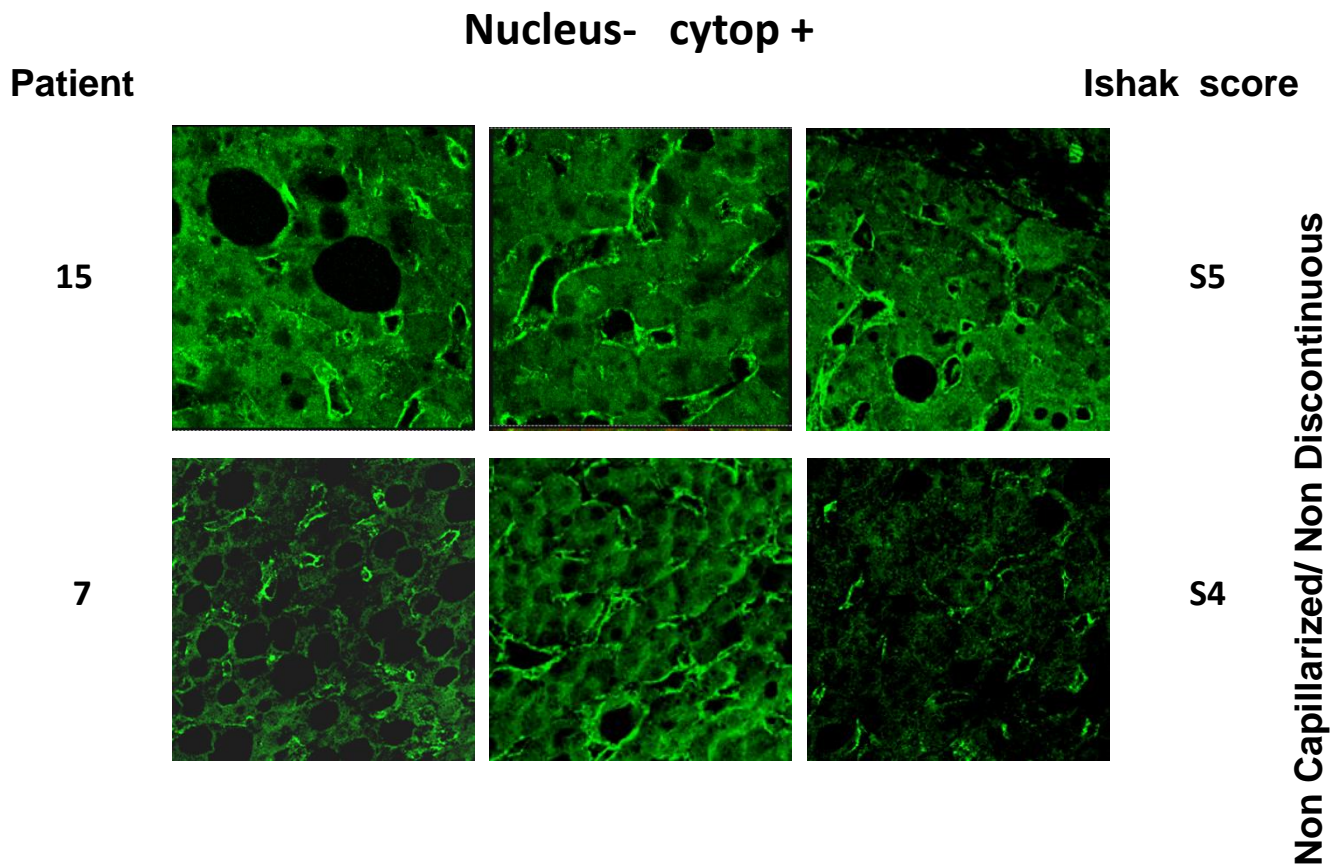

Confocal fuorescence microscopy images showing different pattern of Cav-1 distribution

Two patients for each staining pattern condition and 3 different areas from same patient are shown. Fibrosis score (according to Ishak grading) and LSECs changes are indicated on the left.
